# Supplementary material
Source: Springer Nature journal article supplement (https://www.springermedizin.de/resource/supplementary/13054_2013_2873_MOESM3_ESM.pdf/9714062)

**Bacteremia**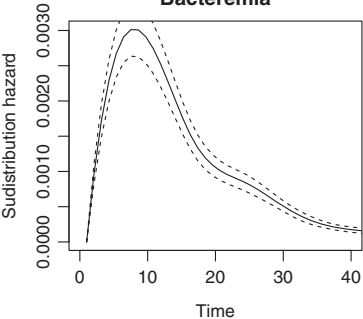**Bacteremia**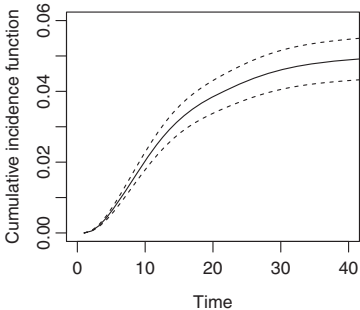

Supplement: MOESM3 [file 9714062]
